# Supplementary material for: Prevalence of Wheezing and Its Association with Environmental Tobacco Smoke Exposure among Rural and Urban Preschool Children in Mpumalanga Province, South Africa
Source: MDPI journal article supplement (doi:10.3390/ijerph21040469), 2024-04-11
Supplement: s1 [file s1]

## Supplementary Materials

Table S1: Total number of pre-schoolers per district (Pre-Covid-19 and data collection)

| Municipality name    | Area type      | Number of pre-schoolers<br>per area type | Total number |
|----------------------|----------------|------------------------------------------|--------------|
| Chief Albert Luthuli | Urban<br>Rural | 360<br>770                               | 1 130        |
| Dipaleseng           | Urban<br>Rural | 283<br>991                               | 1 274        |
| Govan Mbeki          | Rural          | 5451                                     | 5 451        |
| Lekwa                | Rural          | 1 516                                    | 1 516        |
| Mkhondo              | Urban<br>Rural | 443<br>1 418                             | 1 861        |
| Msukukaligwa         | Rural<br>Urban | 90<br>1 380                              | 1 470        |
| DR Pixley ka Seme    | Urban<br>Rural | 157<br>626                               | 783          |
|                      |                |                                          | 13 485       |

Table S2: Sample size calculation (Pre-Covid-19 and data collection)

| Municipalities       | Number of Rural pre-schoolers | Percentage contribution of municipality to the total population% | Required Sample number(n) |
|----------------------|-------------------------------|------------------------------------------------------------------|---------------------------|
| Chief Albert Luthuli | 770                           | 5,7%                                                             | 223                       |
| Dipaleseng           | 991                           | 7,3%                                                             | 287                       |
| Govan Mbeki          | 5451                          | 40,4%                                                            | 1576                      |
| Lekwa                | 1516                          | 11,2%                                                            | 438                       |
| Mkhondo              | 1418                          | 10,5%                                                            | 410                       |
| Msukukaligwa         | 1380                          | 10,2%                                                            | 399                       |
| DR Pixley ka Seme    | 626                           | 4,6%                                                             | 181                       |
| <b>Total</b>         | <b>12 152</b>                 | <b>90,1%</b>                                                     | <b>3 514</b>              |
| Municipalities       | Number of Urban pre-schoolers | Percentage contribution of municipality to the total population% | Required Sample number(n) |
| Chief Albert Luthuli | 360                           | 2,67%                                                            | 105                       |
| Dipaleseng           | 283                           | 2,10%                                                            | 82                        |
| Govan Mbeki          |                               | 0,00%                                                            | 0                         |
| Lekwa                |                               | 0,00%                                                            | 0                         |
| Mkhondo              | 443                           | 3,29%                                                            | 128                       |
| Msukukaligwa         | 90                            | 0,67%                                                            | 26                        |
| DR Pixley ka Seme    | 157                           | 1,16%                                                            | 45                        |
| <b>Total</b>         | <b>1 333</b>                  | <b>9,89%</b>                                                     | <b>386</b>                |
| <b>Grand Total</b>   | <b>13 485</b>                 |                                                                  | <b>3 900</b>              |

Table S3: Data collection using the calculated sample size.

| Municipalities       | Number of Rural pre-schoolers (actual number) | Percentage contribution of municipality to the total population% (pre-covid 19) | Required Sample number(n) (pre-covid 19) | Response number |
|----------------------|-----------------------------------------------|---------------------------------------------------------------------------------|------------------------------------------|-----------------|
| Chief Albert Luthuli | 554                                           | 5,7%                                                                            | 223                                      | 173             |
| Dipaleseng           | 764                                           | 7,3%                                                                            | 287                                      | 200             |
| Govan Mbeki          | 3567                                          | 40,4%                                                                           | 1576                                     | 960             |
| Lekwa                | 1022                                          | 11,2%                                                                           | 438                                      | 297             |
| Mkhondo              | 927                                           | 10,5%                                                                           | 410                                      | 340             |
| Msukukaligwa         | 934                                           | 10,2%                                                                           | 399                                      | 301             |
| DR Pixley ka Seme    | 346                                           | 4,6%                                                                            | 181                                      | 101             |
| <b>Total</b>         | <b>8 114</b>                                  | <b>90,1%</b>                                                                    | <b>3 514</b>                             | <b>2 372</b>    |
| Municipalities       | Number of Urban pre-schoolers (actual number) | Percentage contribution of municipality to the total population% (pre-covid 19) | Required Sample number(n) (pre-covid 19) | Response number |
| Chief Albert Luthuli | 315                                           | 2.67%                                                                           | 105                                      | 265             |
| Dipaleseng           | 219                                           | 2.10%                                                                           | 82                                       | 163             |
| Govan Mbeki          |                                               | 0,00%                                                                           |                                          |                 |
| Lekwa                |                                               | 0.00%                                                                           |                                          |                 |
| Mkhondo              | 334                                           | 3,29%                                                                           | 128                                      | 232             |
| Msukukaligwa         | 72                                            | 0,67%                                                                           | 26                                       | 32              |
| DR Pixley ka Seme    | 126                                           | 1,16%                                                                           | 45                                       | 81              |
| <b>Total</b>         | <b>1 066</b>                                  | <b>9,89%</b>                                                                    | <b>386</b>                               | <b>773</b>      |
| <b>Grand Total</b>   | <b>9 180</b>                                  |                                                                                 | <b>3 900</b>                             |                 |
